# Supplementary material for: Measuring embodied conceptualizations of pitch in singing performances: Insights from an OpenPose study
Source: Frontiers journal article supplement (doi:10.3389/fcomm.2022.957987), 2022-10-04
Supplement: Data_Sheet_1.docx [file Data_Sheet_1.docx]

Supplementary Material

# Supplementary Figures

**Supplementary Figure 1.**

Written notes as composed for the stimulus type ‘rising melodies (linear)’. 7 = ‘r1’, 8 = ‘r2’ and 9 = ‘r3’

**Supplementary Figure 2.**

Written notes as composed for the stimulus type ‘rising melodies (interval)’. 10 = ‘i1’ and 11 = ‘i2’

**Supplementary Figure 3.**

Written notes as composed for the stimulus type ‘falling melodies (linear)’. 12 = ‘f1’ and 13 = ‘f2’

All the melodies above are adapted from Baptist (2014).
